# Supplementary material
Source: PubMed Central journal article supplement (PMC7490830)
Supplement: NIHMS1621639-supplement-Supplement1.pdf [file NIHMS1621639-supplement-Supplement1.pdf]

SUPPORTING INFORMATION FOR:

**Solvent Suitability for HFPO-DA (“GenX” Parent Acid) in Toxicological Studies**

Hannah K. Liberatore,<sup>1</sup> Stephen R. Jackson,<sup>2</sup> Mark J. Strynar,<sup>2</sup> and James P. McCord<sup>2,\*</sup>

<sup>1</sup> Center for Computational Toxicology and Exposure, Office of Research and Development, U.S. Environmental Protection Agency, Research Triangle Park, North Carolina 27711, United States

<sup>2</sup> Center for Environmental Measurement and Modeling, Office of Research and Development, U.S. Environmental Protection Agency, Research Triangle Park, North Carolina 27711, United States

\* Email: [mccord.james@epa.gov](mailto:mccord.james@epa.gov); Phone: 919-541-2137

## Table of Contents

|                                                                                                                                                                                                                        |    |
|------------------------------------------------------------------------------------------------------------------------------------------------------------------------------------------------------------------------|----|
| <b>Tables and Figures</b> .....                                                                                                                                                                                        | S3 |
| Table S1. Instrument Parameters for Fluoroether E-1 GC-Headspace Method .....                                                                                                                                          | S3 |
| Figure S1. Extracted ion chromatogram auto-integrated area of ions used to quantify formation of E-1 from HFPO-DA .....                                                                                                | S4 |
| Figure S2. Regression lines for calibration of E-1 in each of the solvents tested.....                                                                                                                                 | S4 |
| Figure S3. Formation of E-1 from HFPO-DA in DMSO, average $\pm$ 95% CI .....                                                                                                                                           | S5 |
| Figure S4. Measured E-1 formation in ethanol, water, and sesame oil over 25 h at room temperature, demonstrating no significant detection or change over time. Three replicates, average $\pm$ 95% CI error bars ..... | S5 |
| Figure S5. Proposed mechanism of DMSO solvent-mediated degradation of HFPO-DA to Fluoroether E-1 .....                                                                                                                 | S5 |

**Table S1. Instrument Parameters for Fluoroether E-1 GC-Headspace Method**

| <b>Autosampler Parameters</b> |                                                                    |
|-------------------------------|--------------------------------------------------------------------|
| Agitator temperature          | 30 °C                                                              |
| Agitator program              | 2 min; series of 10-s agitations and 2-s pauses                    |
| Headspace syringe temperature | 40 °C                                                              |
| Headspace volume injected     | 0.5 mL                                                             |
| <b>GC Parameters</b>          |                                                                    |
| Inlet temperature             | 200 °C                                                             |
| Carrier gas (He) flow         | 1.5 mL/min                                                         |
| Split flow                    | 22.5 mL/min                                                        |
| GC column composition         | 5% phenyl, 95% dimethyl polysiloxane<br>(30 m × 0.25 mm × 0.25 µm) |
| Oven temperature program      | 35 °C for 2 min; 15 °C/min to 150 °C; hold 0.25 min                |
| Transfer line temperature     | 280 °C                                                             |
| <b>MS Parameters</b>          |                                                                    |
| Ionization type               | Electron ionization (EI)                                           |
| Electron energy               | 70 eV                                                              |
| Emission current              | 50 µA                                                              |
| Source temperature            | 280 °C                                                             |
| <i>m/z</i> range              | 40-600                                                             |
| Resolution                    | 60,000 (at <i>m/z</i> 200)                                         |

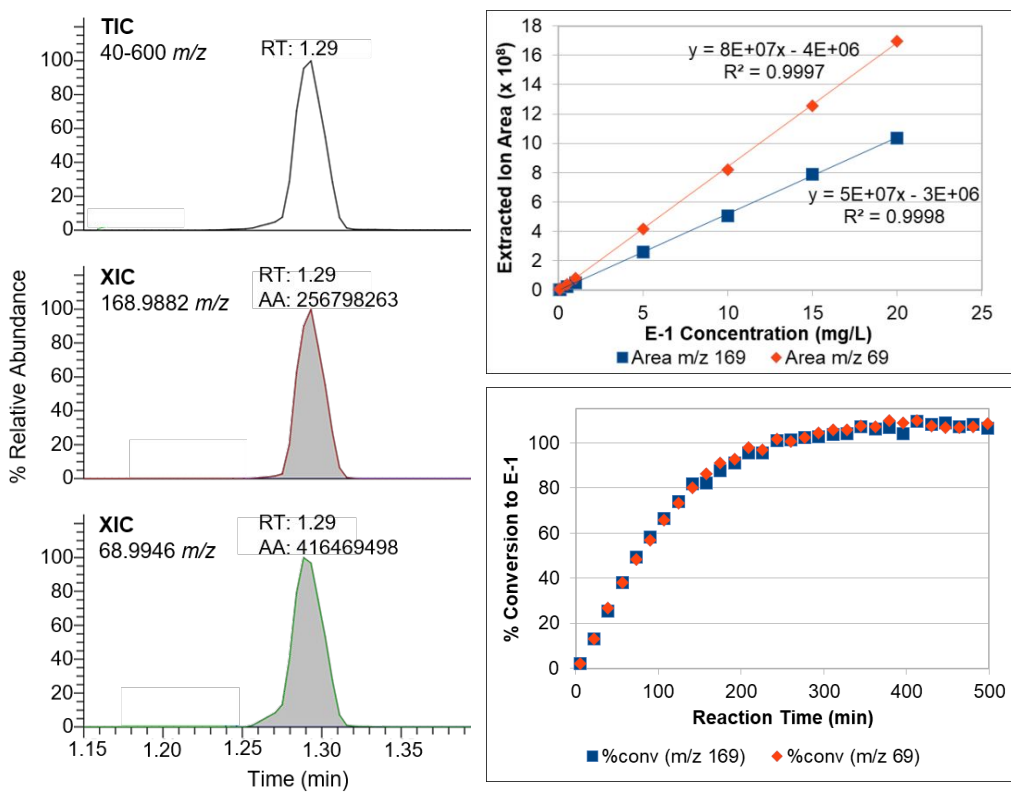

**Figure S1.** Extracted ion chromatogram (XIC) auto-integrated area (AA) of quantifier (68.9946 *m/z*) and qualifier (168.9882 *m/z*) ions (*left*) used to construct calibration curves (*top right*) and quantify the formation of E-1 from HFPO-DA (*bottom right*). Example chromatogram shown: 5 mg/L E-1 standard in DMSO.

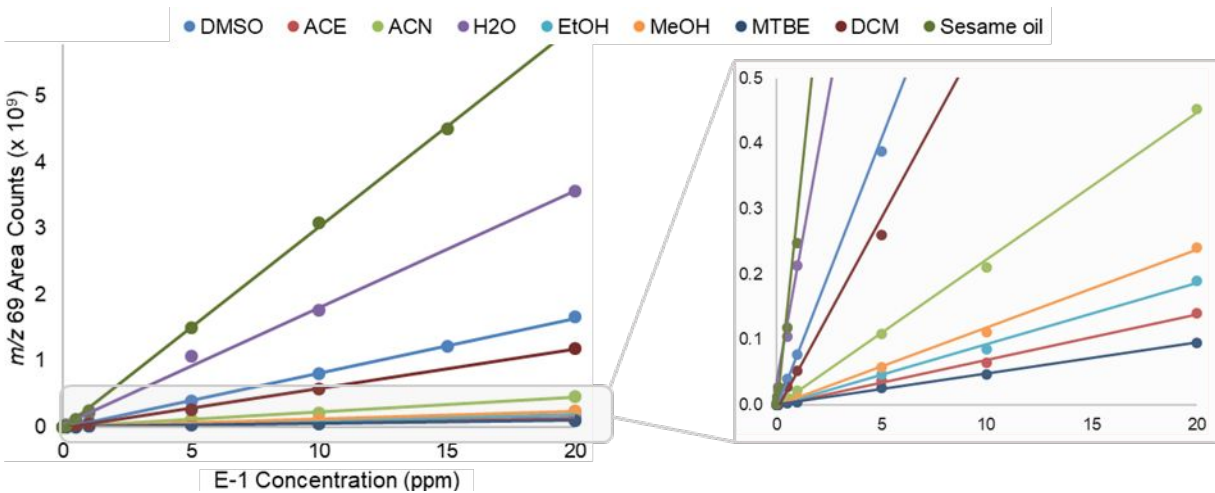

**Figure S2.** Regression lines for calibration of E-1 in each of the solvents tested; *Right*: zoomed inset to show lower sloped curves.

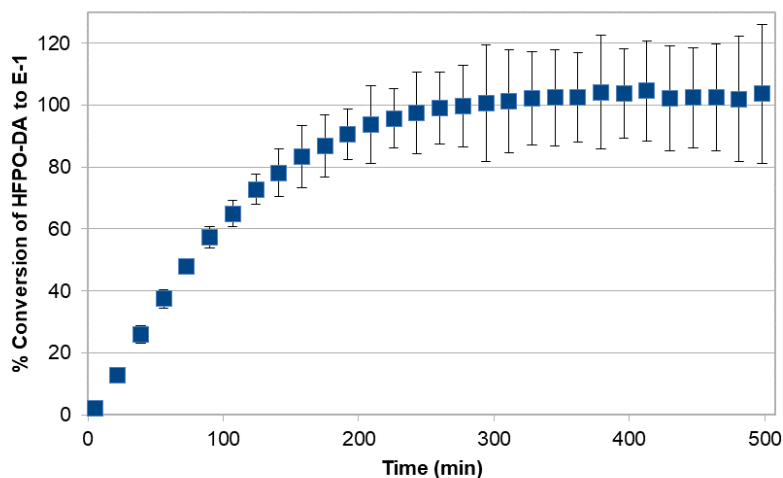

**Figure S3.** Formation of E-1 from HFPO-DA (60.6  $\mu$ M) in DMSO, average  $\pm$  95% CI (n = 3).

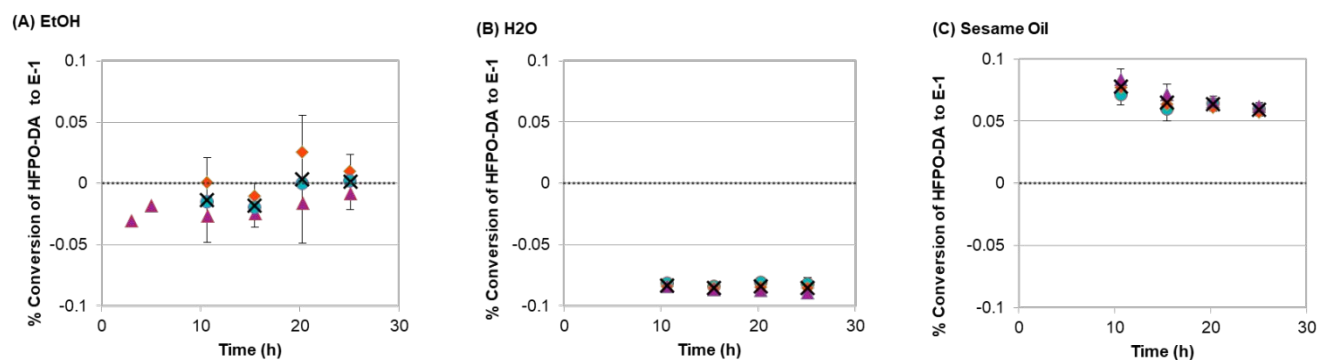

**Figure S4.** Measured E-1 formation in ethanol, water, and sesame oil over 25 h at room temperature, demonstrating no significant detection or change over time. Three replicates ( $\bullet$ ,  $\blacklozenge$ ,  $\blacktriangle$ ), average ( $\times$ )  $\pm$  95% CI error bars.

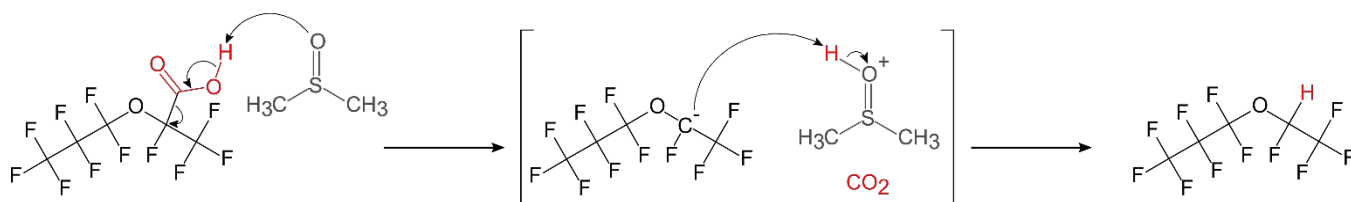

**Figure S5.** Proposed mechanism of DMSO solvent-mediated degradation of HFPO-DA to Fluoroether E-1.
